# Supplementary material
Source: PubMed Central journal article supplement (PMC2568937)
Supplement: M804971200_1.pdf [file M804971200_1.pdf]

***In Vivo* Manipulation of the Bleomycin Biosynthetic Gene Cluster in *Streptomyces verticillus* ATCC15003 Revealing New Insights into its Biosynthetic Pathway**

Ute Galm,<sup>†</sup> Liyan Wang,<sup>†</sup> Evelyn Wendt-Pienkowski,<sup>†</sup> Runying Yang,<sup>‡</sup> Wen Liu,<sup>†</sup> Meifeng Tao,<sup>†</sup>  
Jane M. Coughlin,<sup>†</sup> and Ben Shen<sup>†,‡,§,¶\*</sup>

From the <sup>†</sup>Division of Pharmaceutical Sciences, <sup>‡</sup>University of Wisconsin National Cooperative Drug Discovery Group, and <sup>§</sup>Department of Chemistry, University of Wisconsin-Madison, Madison, Wisconsin, 53705, and <sup>¶</sup>Department of Chemistry, University of California, Davis, California 95616

Running title: *In Vivo* Manipulation of the Bleomycin Biosynthetic Gene Cluster.

Address correspondence to: Ben Shen, Division of Pharmaceutical Sciences, School of Pharmacy, University of Wisconsin-Madison, 777 Highland Ave., Madison, WI 53705, Tel: (608) 263-2673; Fax: (608) 262-5245; Email: [bshen@pharmacy.wisc.edu](mailto:bshen@pharmacy.wisc.edu)

**SUPPLEMENTAL DATA**

|                                                                                           |    |
|-------------------------------------------------------------------------------------------|----|
| EXPERIMENTAL PROCEDURES                                                                   | S2 |
| TABLE S1. Plasmids used in this study                                                     | S3 |
| TABLE S2. Bacterial strains used in this study                                            | S4 |
| TABLE S3. Oligonucleotides used in this study                                             | S5 |
| FIGURE S1. Determination of the <i>blm</i> gene cluster boundaries by gene inactivation   | S6 |
| FIGURE S2. The <i>blm</i> biosynthetic gene cluster from <i>S. verticillus</i> ATCC 15003 | S7 |
| REFERENCES                                                                                | S8 |

## EXPERIMENTAL PROCEDURES

*Sequencing and computer assisted sequence analysis*—Sequencing of an additional 5385 bp beyond the downstream end of the published sequences was performed by primer walking using the dideoxynucleotide chain termination method. Sequencing reactions were run using Big Dye Terminator mix (Applied Biosystems, Foster City, CA), cleaned using CleanSeq magnetic beads (Agencourt Biosciences, Beverly, MA), and sequenced by the University of Wisconsin Biotechnology Center. Samples were electrophoresed on an Applied Biosystems 3700 automated DNA sequencing instrument, and data were analyzed using PE-Biosystems version 3.7 for Sequence Analyses. ORF assignments were made with the assistance of Codon Preference (GCG package, Madison, WI) and BLAST analyses. The DNA sequence reported in this work was determined from pBS40 and has been deposited at GenBank under the accession no. EU805703.

*Isolation and analysis of BLM and decarbamoyl-BLM*—To analyze the production of BLM and decarbamoyl-BLM produced by *S. verticillus* wild-type and the respective recombinant strains, a typical fermentation broth (50 mL) was adjusted to pH 7.0 with 1.0 N HCl and loaded onto an Amberlite IRC50 column (H<sup>+</sup> type, 7-10 mL). After washing the column with 10 bed volumes of H<sub>2</sub>O, BLM and intermediates were eluted with 40 mL of 0.2 N HCl. The resulting eluent was neutralized with 1.0 N NaOH and then evaporated *in vacuo*. The dry material was dissolved in 1 mL of H<sub>2</sub>O. Analytical HPLC was carried out on an Apollo C18 column (5 μm, 250 × 4.6 mm, Alltech Associates, Inc., Deerfield, IL). The column was equilibrated with 100% solvent A (1% HOAc) and 0% solvent B (1% HOAc, 99% methanol) and developed with a linear gradient (0 to 5 min, from 100% A to 90% A/10% B; 5 to 10 min, from 90% A/10% B to 16% A/84% B; 10 to 30 min, from 16% A/84% B to 100% B) at a flow rate of 0.7 mL/min and with UV detection at 300 nm using a Varian Prostar 330 PDA detector (Varian, Palo Alto, CA). The isolated BLM or intermediate at this step was about 90% pure. The identity of BLM was confirmed by LC-ESI mass spectrometry on an Agilent 1100 HPLC-MSD SL quadrupole mass spectrometer.

*Large-scale isolation of decarbamoyl-BLM*—The fermentation culture (10.0 L) was centrifuged at 3000 rpm for 30 min, and the supernatant (8.5 L) was collected, adjusted to pH 7.0 with 1.0 N HCl, and loaded onto an HP-20 column (1.8 L). After washing the column with 10 bed volumes of H<sub>2</sub>O, 3-MOP-decarbamoyl-BLM was eluted with 6.0 L of 50% MeOH. The resulting eluate was concentrated to 10 mL *in vacuo*, loaded onto a Sephadex C-25 column, and eluted with 100 mL of H<sub>2</sub>O, 0.05 M NH<sub>4</sub>OAc, and 0.15 M NH<sub>4</sub>OAc, successively. The eluates were collected and the 3-MOP-decarbamoyl-BLM was found in the 0.15 M NH<sub>4</sub>OAc eluate. The 0.15 M NH<sub>4</sub>OAc eluate was mixed with 20 mL of Amberlite XAD-2 for 30 min. The resin was then washed with excessive water to desalt, and the 3-MOP-decarbamoyl-BLM was eluted with 80% MeOH. Final purification of decarbamoyl-BLM was achieved by semipreparative HPLC on an Altima C18 column (5 μm, 250 × 10 mm, Alltech Associates, Inc.). HPLC isolation was carried out as follows using the same instrument and detector as stated above. The column was equilibrated with 100% solvent A (0.1% TFA) and 0% solvent B (0.1% TFA, 99.9% methanol) and developed with a linear gradient (0 to 20 min, from 90% A/10% B to 40% A/60% B) at a flow rate of 3 mL/min and with UV detection at 300 nm. Under these conditions, decarbamoyl-BLM was eluted with a retention time of 15.2 min. The methanol was removed from the eluate by evaporation at 40°C, and the final pure decarbamoyl-BLM-Cu complex (10.0 mg) was obtained by freeze drying. Cu-free decarbamoyl-BLM was obtained by treating the decarbamoyl-BLM-Cu complex with 0.5 M EDTA-Na (pH 7.3) solution. After the final HPLC purification, Cu-free decarbamoyl-BLM was obtained as a pale white powder (8.0 mg).

TABLE S1. Plasmids used in this study.

| Plasmids              | Description                                                                                                     | Source/reference |
|-----------------------|-----------------------------------------------------------------------------------------------------------------|------------------|
| SuperCos1             |                                                                                                                 | Stratagene       |
| pBluescript II SK (+) |                                                                                                                 | Stratagene       |
| pKC1139               | Temperature sensitive pSG5 derived replicative vector                                                           | (1)              |
| pKC1218               | SCP2* derived replicative vector                                                                                | (1)              |
| pHZ1358               | pIJ101 derived replicative vector                                                                               | (2)              |
| pSET152               | ΦC31 derived integrative vector                                                                                 | (1)              |
| pRT801                | phiBT1 derived integrative vector                                                                               | (3)              |
| pSOK804               | VWB derived integrative vector                                                                                  | (4)              |
| pIJ773                | <i>oriT-aac(3)IV</i> cassette for λRED-mediated PCR-targeting                                                   | (5)              |
| pSET151               | Non-replicative vector in streptomycetes                                                                        | (1)              |
| pBS37                 | Cosmid containing upstream part of the BLM cluster                                                              | this study       |
| pBS38                 | Cosmid containing central part of the BLM cluster                                                               | this study       |
| pBS39                 | Cosmid containing downstream part of the BLM cluster                                                            | this study       |
| pBS40                 | Cosmid containing downstream part of the BLM cluster                                                            | this study       |
| pBS41                 | <i>blmIV</i> inactivation construct in pSET151<br>(4.1-kb and 2.3-kb flanking regions)                          | this study       |
| pBS42                 | <i>blmIV</i> inactivation construct in pSET151<br>(9.8-kb and 7.8-kb flanking regions)                          | this study       |
| pBS43                 | pBS38 derived <i>blmIV</i> gene replacement construct<br>(18.9-kb and 12.9-kb flanking regions)                 | this study       |
| pBS44                 | pBS37 derived <i>blmVIII</i> gene replacement construct<br>(23.5-kb and 12.2-kb flanking regions)               | this study       |
| pBS45                 | pBS37 derived <i>blm-orf31/32</i> gene replacement construct<br>(6.0-kb and 33.1-kb flanking regions)           | this study       |
| pBS46                 | pBS40 derived <i>blm-orf(-1)</i> gene replacement construct<br>(17.6-kb and ~20-kb flanking regions)            | this study       |
| pBS47                 | pBS39 derived <i>blmD</i> gene replacement construct<br>(21.0-kb and ~15-kb flanking regions)                   | this study       |
| pBS48                 | pBS47 derived <i>blmD</i> in-frame deletion construct<br>( <i>bla</i> gene on SuperCos1 backbone)               | this study       |
| pBS49                 | pBS48 derived <i>blmD</i> in-frame deletion construct<br>( <i>aac(3)IV-oriT</i> cassette on SuperCos1 backbone) | this study       |

TABLE S2. Bacterial strains used in this study

| Strains                                      | Description                                                                    | Source/reference                                              |
|----------------------------------------------|--------------------------------------------------------------------------------|---------------------------------------------------------------|
| <i>Escherichia coli</i><br>XL1 Blue MR       |                                                                                | Stratagene                                                    |
| <i>Escherichia coli</i> DH5 $\alpha$         |                                                                                | (6)                                                           |
| <i>Escherichia coli</i> S17-1                |                                                                                | (7)                                                           |
| <i>Escherichia coli</i><br>ET12567(pUZ8002)  |                                                                                | (8)                                                           |
| <i>Escherichia coli</i><br>BW25113/pIJ790    |                                                                                | (5)                                                           |
| <i>Streptomyces verticillus</i><br>ATCC15003 | Wild type BLM producer                                                         | American Type<br>Culture Collection,<br>Rockville, MD,<br>USA |
| SB1                                          | <i>S. verticillus</i> ATCC 15003 $\Delta$ <i>blmIV::aac(3)IV</i> mutant        | this study                                                    |
| SB2                                          | <i>S. verticillus</i> ATCC 15003 $\Delta$ <i>blmVIII::aac(3)IV</i> mutant      | this study                                                    |
| SB3                                          | <i>S. verticillus</i> ATCC 15003 $\Delta$ <i>blm-orf31/32::aac(3)IV</i> mutant | this study                                                    |
| SB4                                          | <i>S. verticillus</i> ATCC 15003 $\Delta$ <i>blm-orf(-1)::aac(3)IV</i> mutant  | this study                                                    |
| SB5                                          | <i>S. verticillus</i> ATCC 15003 $\Delta$ <i>blmD</i> mutant                   | this study                                                    |

TABLE S3. Oligonucleotides used in this study

| Oligonucleotides                                           | Sequence                                                                            | Source/reference |
|------------------------------------------------------------|-------------------------------------------------------------------------------------|------------------|
| - for $\lambda$ RED-mediated PCR-targeting                 |                                                                                     |                  |
| blmIV-1f                                                   | 5'-gccctgtccccgaacgccgggcggttcgagaagatg<br>ATTCCGGGGATCCGTCGACC-3' <sup>a)</sup>    | this study       |
| blmIV-1r                                                   | 5'-cggggagcagtgtcggcgtgggcccggcgctcgtcactc<br>TGTAGGCTGGAGCTGCTTC-3' <sup>a)</sup>  | this study       |
| blmVIII-1f                                                 | 5'-ggtggccgcgcgccgcaggaaaggcggcgacgatgagc<br>ATTCCGGGGATCCGTCGACC-3' <sup>a)</sup>  | this study       |
| blmVIII-1r                                                 | 5'-gctcggtagcaggctcggtagtcggggcggtggtcacag<br>TGTAGGCTGGAGCTGCTTC-3' <sup>a)</sup>  | this study       |
| NRPS10-1f                                                  | 5'-acgcgctccgcagcgtctcgtgccgtcccaccagcatcc<br>ATTCCGGGGATCCGTCGACC-3' <sup>a)</sup> | this study       |
| PHNA-1r                                                    | 5'-agtctctcgtgaccgagaaccttcgctggtccccgaa<br>TGTAGGCTGGAGCTGCTTC-3' <sup>a)</sup>    | this study       |
| treh-1f                                                    | 5'-gccccccctgggacacgacggaagcgaggccggtgatg<br>ATTCCGGGGATCCGTCGACC-3' <sup>a)</sup>  | this study       |
| treh-1r                                                    | 5'-ccatccgcacagggtgaatggccggggcgacgcctca<br>TGTAGGCTGGAGCTGCTTC-3' <sup>a)</sup>    | this study       |
| blmD-1f                                                    | 5'-gagccccaccccgtgacgatcaggagtaccccatgagc<br>ATTCCGGGGATCCGTCGACC-3' <sup>a)</sup>  | this study       |
| blmD-1r                                                    | 5'-gccgctgacgatgagccccgggagcaccagggtggtcgag<br>TGTAGGCTGGAGCTGCTTC-3' <sup>a)</sup> | this study       |
| f-pMT3                                                     | 5'-CTCACGTTAAGGGATTTTGGTCATG-3'                                                     | (9)              |
| r-pMT3                                                     | 5'-GGAAGAGTATGAGTATTCAACATTTCCGTG<br>TCGCCCTTATGCATGCCTGCAGGTCGACGG-3'              | (9)              |
| - for PCR and Southern blot verification of mutant strains |                                                                                     |                  |
| blmIV-2f                                                   | 5'-GCTGACCTCGATCCCGGCAC-3'                                                          | this study       |
| blmIV-2r                                                   | 5'-CGGGTGCGGTGCGGTTCGTTTC-3'                                                        | this study       |
| blmVIII-2f                                                 | 5'-AGGAGGACGCGCGGAGACG-3'                                                           | this study       |
| blmVIII-2r                                                 | 5'-CCGTCGGCCGTGAGGGTCAC-3'                                                          | this study       |
| C-PHNA-f1                                                  | 5'-GCAGCGTCATGAACAGGGTG-3'                                                          | this study       |
| C-PHNA-r1                                                  | 5'-CCGGACCATCATGTAGCGAC-3'                                                          | this study       |
| C-treh-f1                                                  | 5'-GGTCGACATCGTCGGTCACTCG-3'                                                        | this study       |
| C-treh-r1                                                  | 5'-CACGCACACGATCGAAGACCTG-3'                                                        | this study       |
| C-blmD-f2                                                  | 5'-CCGCACTGGAACAGGAGATG-3'                                                          | this study       |
| C-blmD-r                                                   | 5'- <u>GTCTAGAT</u> GTTCGCGTTCGAG-3' <sup>b)</sup>                                  | this study       |
| blmIII/IVprobe-f                                           | 5'-TCGCACGAGGTGCGCGACGC-3'                                                          | this study       |
| blmIII/IVprobe-r                                           | 5'-GTACCGGCGGCCCGGGTTCG-3'                                                          | this study       |
| blmVIIprobe-f                                              | 5'-ACGAGCCCACGGTGGCGGCG-3'                                                          | this study       |
| blmVIIprobe-r                                              | 5'-GCGCGACCGGCTCGGCGATC-3'                                                          | this study       |
| Treh-p-f1                                                  | 5'-GTGTCCAGGACACGGCAGTC-3'                                                          | this study       |
| Treh-p-r1                                                  | 5'-GCGGCATCATGCCACCTTGC-3'                                                          | this study       |
| C-blmE-f2                                                  | 5'-CCTACCACGTGGTGGTCAAC-3'                                                          | this study       |
| C-blmE-r                                                   | 5'-AGTCTAGACGGAGAGGATCG-3' <sup>b)</sup>                                            | this study       |

<sup>a)</sup> lower case letters represent DNA sequence originating from *S. verticillus* and upper case letters represent DNA sequence flanking the *aac(3)IV-oriT* cassette from pIJ773

<sup>b)</sup> underlined sequence represents an introduced *XbaI* restriction site

FIGURE S1. Determination of the *blm* gene cluster boundaries by gene replacements of *blm-orf31/32* and *blm-orf(-1)*. Construction of the *blm-orf31/32* (A) and *blm-orf(-1)* (C) gene replacement mutants and restriction map of *S. verticillus* wild-type (A and C), SB3 (A) and SB4 (C) mutant strains showing fragment sizes upon *Bam*HI (A) and *Sst*I (C) digestion, respectively. (B) Southern analysis of *S. verticillus* wild-type (B, lane 2; D, lane 3), SB3 (B, lane 1), and SB4 (D, lane 2) genomic DNA digested with *Bam*HI (B) and *Sst*I (D), respectively, using a 1.446-kb *Bam*HI fragment of a 2.788-kb PCR amplified product (B) and a 1.110-kb PCR-amplified fragment (D) as probes. Molecular weight marker, lane 3 (B) and lane 1 (D). B, *Bam*HI; S, *Sst*I; Apra<sup>R</sup>, apramycin resistant; Apra<sup>S</sup>, apramycin sensitive.

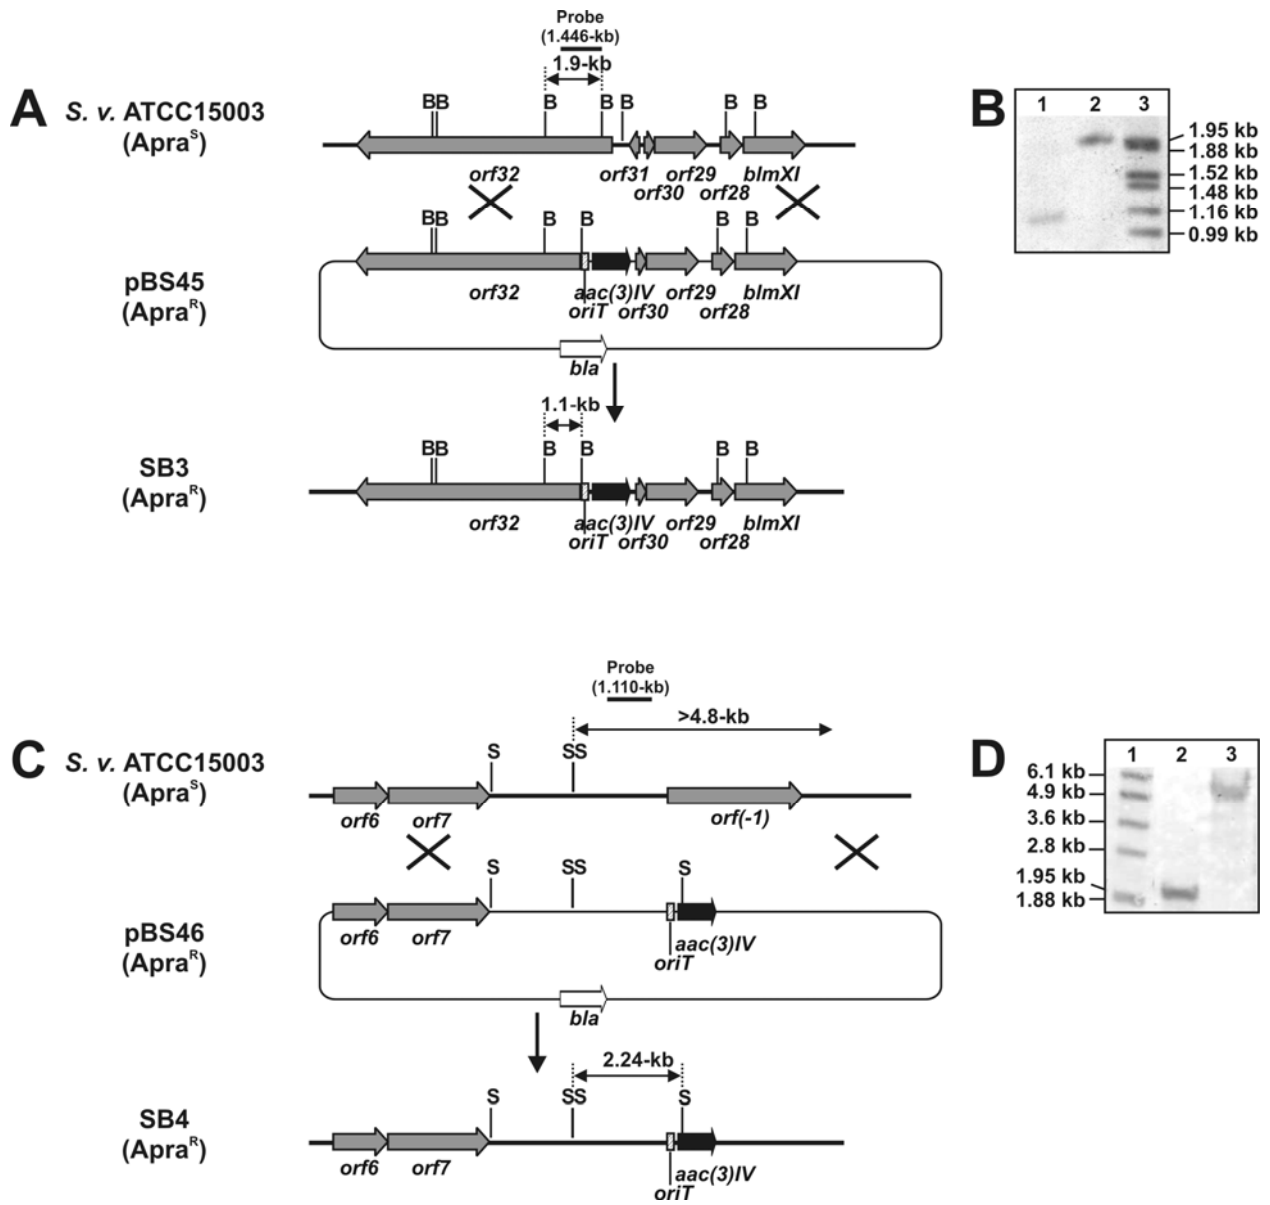

FIGURE S2. Restriction map of the sequenced 90-kb DNA region from *S. verticillus* ATCC 15003 and genetic organization of the *blm* biosynthetic gene cluster. The cluster boundaries have been determined experimentally in this study to be between *orf31* and *orf30* (upstream) and between *orf7* and *orf(-1)* (downstream), respectively.

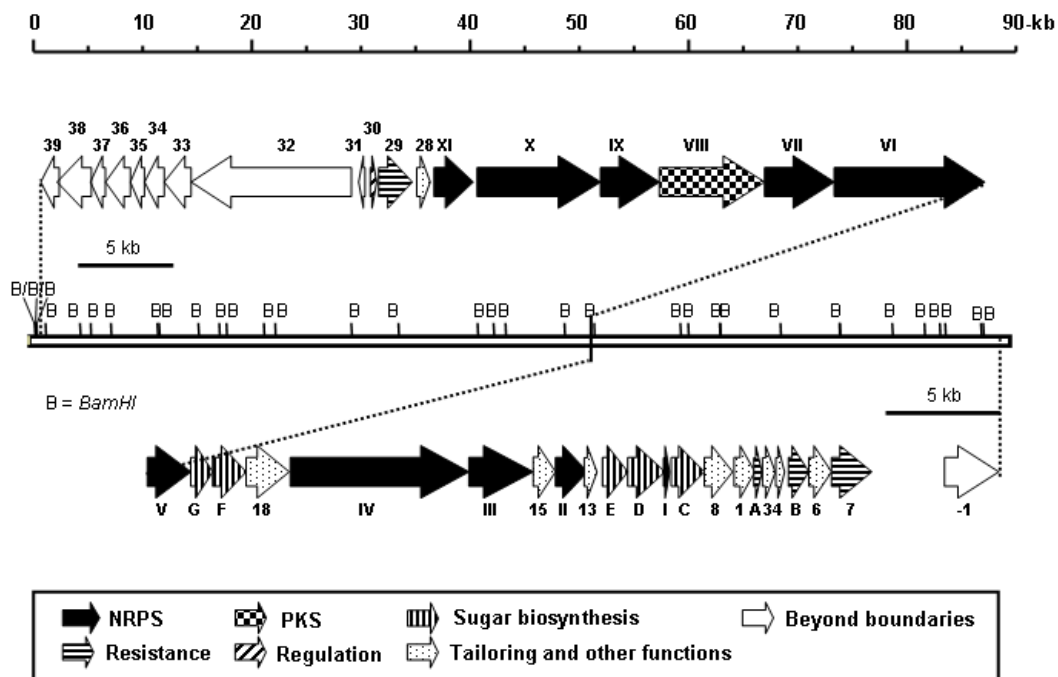

## REFERENCES

1. Bierman, M., Logan, R., O'Brien, K., Seno, E.T., Rao, R.N., and Schoner, B.E. (1992) *Gene* **116**, 43-49.
2. Sun, Y., Zhou, X., Liu, J., Bao, K., Zhang, G., Tu, G., Kieser, T., and Deng, Z. (2002) *Microbiology* **148**, 361-371.
3. Gregory, M.A., Till, R., and Smith, M.C. (2003) *J. Bacteriol.* **185**, 5320-5323.
4. Sekurova, O.N., Brautaset, T., Sletta, H., Borgos, S.E., Jakobsen, M.O., Ellingsen, T.E., Strom, A.R., Valla, S., and Zotchev, S.B. (2004) *J. Bacteriol.* **186**, 1345-1354.
5. Gust, B., Challis, G.L., Fowler, K., Kieser, T., and Chater, K.F. (2003) *Proc. Natl. Acad. Sci. U.S.A.* **100**, 1541-1546.
6. Sambrook, J., Russell, D.W. (2001). *Molecular cloning: a laboratory manual*,. 3<sup>rd</sup> Ed., Cold Spring Harbor Laboratory Press, New York.
7. Kieser, T., Bibb, M.J., Buttner, M.J., Chater, K.F., and Hopwood, D.A. (2000) *Practical Streptomyces Genetics*, 2<sup>nd</sup> Ed., John Innes Foundation, Norwich, UK.
8. Paget, M.S., Chamberlin, L., Atrih, A., Foster, S.J., and Buttner, M.J. (1999) *J. Bacteriol.* **181**, 204-211.
9. Tao, M., Wang, L., Wendt-Pienkowski, E., George, N.P., Galm, U., Zhang, G., Coughlin, J.M., and Shen, B. (2007) *Mol. BioSyst.* **3**, 60-74.
